# Supplementary material for: Secretion of Glucose-Dependent Insulinotropic Polypeptide in Patients With Type 2 Diabetes
Source: Oxford University Press journal article supplement (doi:10.2337/dc13-0465), 2013-09-14
Supplement: dc130465supplementarydata.pdf [file dc130465supplementarydata.pdf]

## SUPPLEMENTARY DATA

### Full electronic search strategy

The PubMed search syntax served as the basis for all search strategies, using both Medical Subject Headings (MeSH) and text terms with Boolean operators. The syntax consisted of three search themes intersected by the Boolean term “AND”. MESH terms included terms related to glucose-dependent insulinotropic polypeptide (“Glucose-dependent insulinotropic polypeptide”, “Incretins”, “Gastric inhibitory peptide”, “Diabetes Mellitus”) and intervention-related terms (“Glucose tolerance test”).

The first theme, glucose-dependent insulinotropic polypeptide, combined exploded versions of Medical Subject Headings (MeSH) “Glucose-dependent insulinotropic polypeptide” or “Incretins” or “Gastric inhibitory peptide” or “Diabetes Mellitus” or text terms *GIP* or *diabetes* or *diabetic patients* or *incretin* or *gut hormones*.

The second theme, intervention, combined exploded versions of MeSH terms “Glucose tolerance test” or text terms *OGTT* or *mixed meal test* or *load* or *stimulus* or *secretion* or *response* or *nutrients*.

For the third theme, because we focused on controlled studies, we excluded other design types using the Cochrane Highly Sensitive Search Strategy for identifying trials in MEDLINE, sensitivity-maximizing version: *controlled clinical trial[pt]* or *trial[tiab]* or *groups[tiab]*. The strategy to remove articles dealing only with animals was NOT (animals[mh] NOT humans[mh]). The search strategy was then adapted for Cochrane Library, Embase, and Web of Science.

SUPPLEMENTARY DATA

**Supplementary Table 1.** Characteristics of the trials

| Trial (year of publication)<br>(reference) | Patients with<br>type 2 diabetes<br>(n=363) | Non-diabetic<br>control subjects<br>(n=325) | Type of test(s)             | Duration<br>of test<br>(hours) |
|--------------------------------------------|---------------------------------------------|---------------------------------------------|-----------------------------|--------------------------------|
| Alam et al (1992) (1)                      | 13                                          | 18                                          | 75g-OGTT                    | 2                              |
| Bagger et al (2011) (2)                    | 8                                           | 8                                           | 25g-OGTT                    | 4                              |
|                                            |                                             |                                             | 75g-OGTT                    |                                |
|                                            |                                             |                                             | 125g-OGTT                   |                                |
| Bose et al (2009) (3)                      | 11                                          | 8                                           | 50g-OGTT                    | 3                              |
| Brown et al (2012) (4)                     | 10                                          | 25                                          | 75g-OGTT                    | 3                              |
| Han et al (2010) (5)                       | 20                                          | 20                                          | 556 kcal-meal <sup>a</sup>  | 3                              |
| Højberg et al (2008) (6)                   | 9                                           | 9                                           | 537 kcal-meal <sup>a</sup>  | 4                              |
| Jones et al (1989) (7)                     | 68                                          | 31                                          | 75g-OGTT                    | 4                              |
|                                            |                                             |                                             | 500 kcal- meal <sup>a</sup> |                                |
| Knop et al (2007) (8)                      | 8                                           | 8                                           | 50g-OGTT                    | 4                              |
| Knop et al (2007) (9)                      | 10                                          | 10                                          | 50g-OGTT                    | 4                              |
| Laferrère et al (2007) (10)                | 8                                           | 7                                           | 50g-OGTT                    | 3                              |
| Meneilly et al (2000) (11)                 | 12                                          | 9                                           | 40g/m <sup>2</sup> -OGTT    | 3                              |
| Rijkelijkhuisen et al (2009) (12)          | 18                                          | 6                                           | 460 kcal-meal <sup>a</sup>  | 2                              |
|                                            |                                             |                                             | 680 kcal-meal <sup>a</sup>  |                                |
|                                            |                                             |                                             | 833 kcal-meal <sup>a</sup>  |                                |
| Romero et al (2012) (13)                   | 5                                           | 5                                           | 398 kcal-meal <sup>b</sup>  | 2                              |
| Ryskjær et al (2006) (14)                  | 8                                           | 8                                           | 652 kcal-meal <sup>a</sup>  | 3                              |
| Salinari et al (2009) (15)                 | 9                                           | 6                                           | 75g-OGTT                    | 4                              |
| Skrha et al (2010) (16)                    | 17                                          | 17                                          | 442 kcal- meal <sup>a</sup> | 1.5                            |
| Solomon et al (2010) (17)                  | 13                                          | 16                                          | 75g-OGTT                    | 2                              |
| Theodorakis et al (2006) (18)              | 17                                          | 36                                          | 75g-OGTT                    | 2                              |
| Toft-Nielsen et al (2001) (19)             | 54                                          | 33                                          | 537 kcal-meal <sup>a</sup>  | 4                              |
| Vaag et al (1996) (20)                     | 12                                          | 13                                          | 75g-OGTT                    | 3                              |
| Vilsbøll et al (2001) (21)                 | 12                                          | 12                                          | 566 kcal-meal <sup>a</sup>  | 3                              |
| Vilsbøll et al (2003) (22)                 | 8                                           | 8                                           | 260 kcal-meal <sup>a</sup>  | 3                              |
|                                            |                                             |                                             | 520 kcal-meal <sup>a</sup>  |                                |

<sup>a</sup>Solid mixed meal test, <sup>b</sup>Liquid mixed meal test. OGTT, oral glucose tolerance test.

**Supplementary Table 2.** Random effects meta-regression

|       | Peak (pmol/l) | tAUC<br>(pmol/l×time) | iAUC<br>(pmol/l×time) | iAUC×min <sup>-1</sup><br>(pmol/l) |
|-------|---------------|-----------------------|-----------------------|------------------------------------|
| Age   | P=0.03        | P=0.02                | P=0.005               | P=0.001                            |
| BMI   |               | P=0.003               | P=0.006               | P=0.003                            |
| HbA1c |               |                       | P=0.007               | P=0.002                            |

*Random effects meta-regression* of the primary meta-analysis evaluating glucose-dependent insulinotropic polypeptide outcomes. HbA1c, hemoglobin A1c. tAUC, total area under the curve. iAUC, incremental area under the curve. iAUC×min<sup>-1</sup>, time-corrected (for duration of test) iAUC.

SUPPLEMENTARY DATA

**Supplementary Table 3.** Analysis of outdated assays

|                      | Fasting levels<br>(pmol/l) | Peak (pmol/l)     | iAUC<br>(pmol/l×time) | iAUC×min <sup>-1</sup><br>(pmol/l) |
|----------------------|----------------------------|-------------------|-----------------------|------------------------------------|
| Random effect models | 17.2 [6.9, 27.6]           | 55.4 [8, 103]     | 169 [-186, 525]       | 1.6 [-2.8, 6]                      |
| Fixed effects models | 16.8 [10, 23.6]            | 48.5 [27.5, 69.5] | 204 [66, 342]         | 2.4 [0.7, 4.1]                     |

Data are expressed as weighted mean difference (WMD) with 95% confidence interval in parentheses. Negative WMD values represent lower glucose-dependent insulinotropic peptide responses and positive values reflect greater responses in patients with type 2 diabetes compared with non-diabetic control subjects. iAUC, incremental area under the curve. iAUC×min<sup>-1</sup>, time-corrected (for duration of test) iAUC.

SUPPLEMENTARY DATA

Supplementary Figure 1. Peak GIP

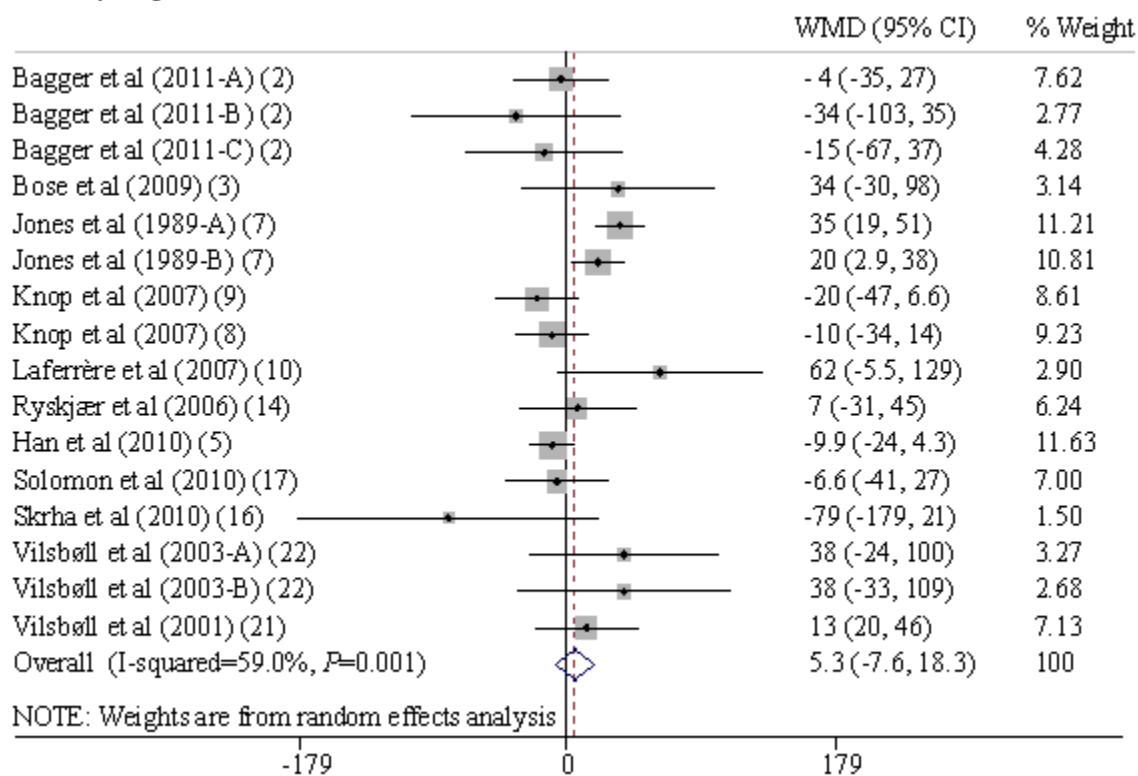

Meta-analysis of plasma total glucose-dependent insulinotropic polypeptide (GIP) responses during an oral glucose tolerance test (OGTT) or meal test evaluated from plasma peak levels using random effects model. WMD: weighted mean difference. Capital letters indicate different GIP secretory stimuli in the same study.

SUPPLEMENTARY DATA

**Supplementary Figure 2.** Total area under the curve for GIP

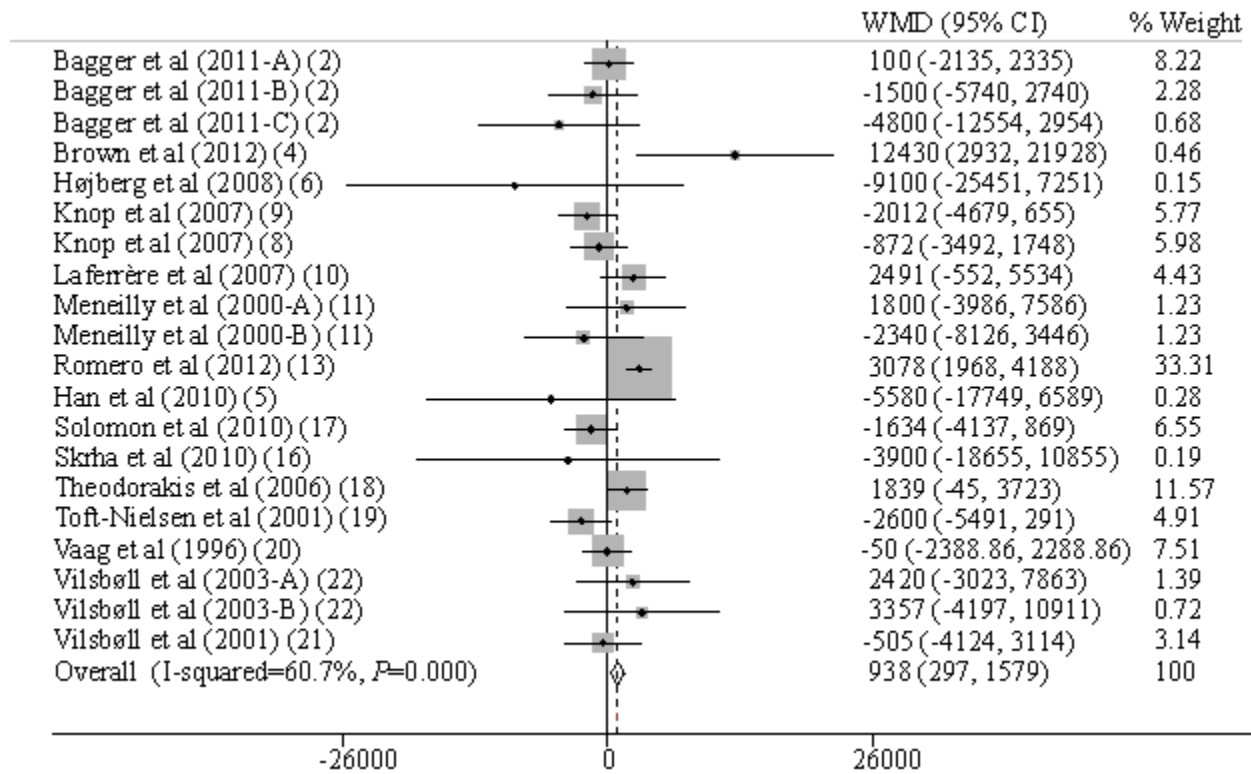

Meta-analysis of plasma total glucose-dependent insulintropic polypeptide (GIP) responses during an oral glucose tolerance test (OGTT) or meal test evaluated from total area under the curve (tAUC) (pmol/l×min) using fixed effects model. WMD: weighted mean difference. Capital letters indicate different GIP secretory stimuli in the same study.

## References

1. Alam MJ, Kerr JI, Cormican K, Buchanan KD. Gastric inhibitory polypeptide (GIP) response in diabetes using a highly specific antiserum. *Diabet Med* 1992;**9**:542–5.
2. Bagger JI, Knop FK, Lund A, Vestergaard H, Holst JJ, Vilsbøll T. Impaired regulation of the incretin effect in patients with type 2 diabetes. *J Clin Endocrinol Metab* 2011;**96**:737–45.
3. Bose M, Teixeira J, Olivan B, Bawa B, Arias S, Machineni S, *et al.* Weight loss and incretin responsiveness improve glucose control independently after gastric bypass surgery. *J Diabetes* 2010;**2**:47–55.
4. Brown RJ, Walter M, Rother KI. Effects of diet soda on gut hormones in youths with diabetes. *Diabetes Care* 2012;**35**:959–64.
5. Han SJ, Kim HJ, Choi S-E, Kang Y, Lee KW, Kim DJ. Incretin secretion and serum DPP-IV activity in Korean patients with type 2 diabetes. *Diabetes Res Clin Pract* 2010;**89**:e49–52.
6. Højberg PV, Vilsbøll T, Zander M, Knop FK, Krarup T, Vølund A, *et al.* Four weeks of near-normalization of blood glucose has no effect on postprandial GLP-1 and GIP secretion, but augments pancreatic B-cell responsiveness to a meal in patients with Type 2 diabetes. *Diabet Med* 2008;**25**:1268–75.
7. Jones IR, Owens DR, Luzio S, Williams S, Hayes TM. The glucose dependent insulinotropic polypeptide response to oral glucose and mixed meals is increased in patients with type 2 (non-insulin-dependent) diabetes mellitus. *Diabetologia* 1989;**32**:668–77.
8. Knop FK, Vilsbøll T, Madsbad S, Holst JJ, Krarup T. Inappropriate suppression of glucagon during OGTT but not during isoglycaemic i.v. glucose infusion contributes to the reduced incretin effect in type 2 diabetes mellitus. *Diabetologia* 2007;**50**:797–805.
9. Knop FK, Vilsbøll T, Højberg PV, Larsen S, Madsbad S, Vølund A, *et al.* Reduced incretin effect in type 2 diabetes: cause or consequence of the diabetic state? *Diabetes* 2007;**56**:1951–9.
10. Laferrère B, Heshka S, Wang K, Khan Y, McGinty J, Teixeira J, *et al.* Incretin levels and effect are markedly enhanced 1 month after Roux-en-Y gastric bypass surgery in obese patients with type 2 diabetes. *Diabetes Care* 2007;**30**:1709–16.
11. Meneilly GS, Demuth HU, McIntosh CH, Pederson RA. Effect of ageing and diabetes on glucose-dependent insulinotropic polypeptide and dipeptidyl peptidase IV responses to oral glucose. *Diabet Med* 2000;**17**:346–50.
12. Rijkkelijkhuizen JM, McQuarrie K, Girman CJ, Stein PP, Mari A, Holst JJ, *et al.* Effects of meal size and composition on incretin, alpha-cell, and beta-cell responses. *Metab Clin Exp* 2010;**59**:502–11.
13. Romero F, Nicolau J, Flores L, Casamitjana R, Ibarzabal A, Lacy A, *et al.* Comparable early changes in gastrointestinal hormones after sleeve gastrectomy and Roux-En-Y gastric bypass surgery for morbidly obese type 2 diabetic subjects. *Surg Endosc* 2012;**26**:2231–9.
14. Ryskjær J, Deacon CF, Carr RD, Krarup T, Madsbad S, Holst J, *et al.* Plasma dipeptidyl peptidase-IV activity in patients with type-2 diabetes mellitus correlates positively with HbA1c levels, but is not acutely affected by food intake. *Eur J Endocrinol* 2006;**155**:485–93.
15. Salinari S, Bertuzzi A, Asnaghi S, Guidone C, Manco M, Mingrone G. First-phase insulin secretion restoration and differential response to glucose load depending on the route of administration in type 2 diabetic subjects after bariatric surgery. *Diabetes Care* 2009;**32**:375–80.
16. Skrha J, Hilgertová J, Jarolímková M, Kunešová M, Hill M. Meal test for glucose-dependent insulinotropic peptide (GIP) in obese and type 2 diabetic patients. *Physiol Res* 2010;**59**:749–55.
17. Solomon TPJ, Haus JM, Kelly KR, Rocco M, Kashyap SR, Kirwan JP. Improved pancreatic beta-cell function in type 2 diabetic patients after lifestyle-induced weight loss is related to glucose-dependent insulinotropic polypeptide. *Diabetes Care* 2010;**33**:1561–6.

## SUPPLEMENTARY DATA

18. Theodorakis MJ, Carlson O, Michopoulos S, Doyle ME, Juhaszova M, Petraki K, *et al.* Human duodenal enteroendocrine cells: source of both incretin peptides, GLP-1 and GIP. *Am J Physiol Endocrinol Metab* 2006;**290**:E550–559.
19. Toft-Nielsen MB, Damholt MB, Madsbad S, Hilsted LM, Hughes TE, Michelsen BK, *et al.* Determinants of the impaired secretion of glucagon-like peptide-1 in type 2 diabetic patients. *J Clin Endocrinol Metab* 2001;**86**:3717–23.
20. Vaag AA, Holst JJ, Vølund A, Beck-Nielsen HB. Gut incretin hormones in identical twins discordant for non-insulin-dependent diabetes mellitus (NIDDM)--evidence for decreased glucagon-like peptide 1 secretion during oral glucose ingestion in NIDDM twins. *Eur J Endocrinol* 1996;**135**:425–32.
21. Vilsbøll T, Krarup T, Deacon CF, Madsbad S, Holst JJ. Reduced postprandial concentrations of intact biologically active glucagon-like peptide 1 in type 2 diabetic patients. *Diabetes* 2001;**50**:609–13.
22. Vilsbøll T, Krarup T, Sonne J, Madsbad S, Vølund A, Juul AG, *et al.* Incretin secretion in relation to meal size and body weight in healthy subjects and people with type 1 and type 2 diabetes mellitus. *J Clin Endocrinol Metab* 2003;**88**:2706–13.
